# Supplementary material for: Causes of Death and Pathological Findings in Stranded Harbour Porpoises (Phocoena phocoena) from Swedish Waters
Source: MDPI journal article supplement (doi:10.3390/ani12030369), 2022-02-03
Supplement: s1 [file s1]

Table S1. Metadata for 128 stranded harbour porpoises (*Phocoena phocoena*) that stranded in Sweden from 2006 to 2020 and were examined by necropsy.

| SVA ID       | NRM ID      | Date Found | Location   | Coordinate N (RT90) | Coordinate E (RT90) | Sex | Age class | Length (cm) | Nutritional status <sup>a</sup> | Decomposition Score <sup>b</sup> | Primary Diagnosis category | Primary diagnosis                           | Secondary diagnosis(es)                                                                                    |
|--------------|-------------|------------|------------|---------------------|---------------------|-----|-----------|-------------|---------------------------------|----------------------------------|----------------------------|---------------------------------------------|------------------------------------------------------------------------------------------------------------|
| 09-VLT000508 | C2007/08061 | 2007-12-14 | Onsala     | 6400365             | 1263474             | F   | Juvenile  | 125,5       | 3                               | 1                                | Probable bycatch           | Probable bycatch                            | Moderate granulomatous pneumonia associated with moderate lungworm infection; mild granulomatous steatitis |
| 09-VLT000509 | C2008/08899 | 2008-12-21 | Bo         | 6492877             | 1235776             | F   | Calf      | 113,5       | 3                               | 3                                | Infectious disease         | Fungal pneumonia ( <i>Aspergillus sp.</i> ) | Mild cholangitis                                                                                           |
| 09-VLT000722 | C2007/08062 | 2007-10-16 | Malövikén  | 6384800             | 1268222             | F   | Calf      | 100,5       | 1                               | 3                                | Emaciation                 | Emaciation                                  |                                                                                                            |
| 09-VLT000723 | C2007/08063 | 2006-09-25 | Lysekil    | 6470736             | 1243532             | M   | Calf      | 109,5       | 3                               | 2                                | Probable bycatch           | Probable bycatch                            |                                                                                                            |
| 09-VLT001657 | C2009/02664 | 2009-06-01 | Kungälv    | 6419774             | 1252395             | M   | Neonate   | 69,0        | 1                               | 1                                | Emaciation                 | Emaciation                                  |                                                                                                            |
| 09-VLT001659 | C2009/02666 | 2009-04-01 | Strömstad  | 6544445             | 1232847             | M   | Calf      | 115,0       | 3                               | 2                                | Trauma                     | Blunt trauma                                |                                                                                                            |
| 09-VLT001660 | C2009/04448 | 2009-06-08 | Vrångö     | 6389340             | 1259900             | F   | Adult     | 159,5       | 3                               | 1                                | Non-infectious disease     | Dystocia                                    | Mild gastric ulceration with associated Anisakis infection; moderate biliary trematode infection           |
| 09-VLT001661 | C2009/04450 | 2009-08-25 | Ljunghusen | 6146021             | 1317856             | F   | Neonate   | 70,5        | 3                               | 2                                | Undetermined               | Undetermined; head missing                  |                                                                                                            |
| 09-VLT001662 | C2009/04451 | 2009-08-26 | Ljunghusen | 6144384             | 1318573             | F   | Juvenile  | 119,0       | .                               | 3                                | Unsuitable material        | Unsuitable material; severely decomposed    |                                                                                                            |

|              |             |            |               |         |         |   |         |       |   |   |                        |                  |                                                                                                                                                                                                                                                                          |
|--------------|-------------|------------|---------------|---------|---------|---|---------|-------|---|---|------------------------|------------------|--------------------------------------------------------------------------------------------------------------------------------------------------------------------------------------------------------------------------------------------------------------------------|
| 09-VLT001884 | C2009/07366 | 2009-09-17 | Ribersberg    | 6167647 | 1320986 | F | Adult   | .     | 3 | 3 | Undetermined           | Undetermined     | Mild to moderate granulomatous pneumonia associated with moderate lungworm infestation; moderate Anisakis-associated ulceration in forestomach; mild to moderate biliary trematode infection with associated cholangitis; moderate nematode infection in tympanic cavity |
| 10-VLT001480 | C2010/05198 | 2010-08-17 | Båstad        | 6259600 | 1317000 | F | Neonate | 78,0  | 3 | 4 | Non-infectious disease | Stillborn        |                                                                                                                                                                                                                                                                          |
| 10-VLT002074 | C2010/05196 | 2010-09-24 | Helsingborg   | 6217000 | 1306000 | M | Calf    | 104,5 | 3 | 2 | Probable bycatch       | Probable bycatch |                                                                                                                                                                                                                                                                          |
| 10-VLT002075 | C2010/05197 | 2010-07-20 | Helsingborg   | 6217000 | 1306000 | M | Neonate | 89,5  | 3 | 1 | Probable bycatch       | Probable bycatch |                                                                                                                                                                                                                                                                          |
| 10-VLT002545 | C2010/10094 | 2010-07-22 | Älvsborgsbron | 6403000 | 1267000 | F | Neonate | 83,0  | 2 | 3 | Abandoned              | Abandoned        | Emaciated                                                                                                                                                                                                                                                                |
| 10-VLT002546 | C2010/10096 | 2010-08-02 | Halland       | 6294475 | 1301439 | F | Adult   | 156,0 | 2 | 2 | Bycatch                | Bycatch          | Mild granulomatous pneumonia associated with moderate                                                                                                                                                                                                                    |

|              |             |            |            |         |         |   |          |       |   |   |                  |                  |                                                                                                                                                                                                                            |
|--------------|-------------|------------|------------|---------|---------|---|----------|-------|---|---|------------------|------------------|----------------------------------------------------------------------------------------------------------------------------------------------------------------------------------------------------------------------------|
|              |             |            |            |         |         |   |          |       |   |   |                  |                  | lungworm infection                                                                                                                                                                                                         |
| 10-VLT002547 | C2010/10098 | 2010-10-31 | Varberg    | 6336000 | 1284000 | F | Adult    | 144,0 | . | 2 | Undetermined     | Undetermined     | Moderate to severe lungworm infection associated with moderate granulomatous pneumonia; mild to moderate biliary trematode infection with associated cholangitis; moderate to severe nematode infection in tympanic cavity |
| 10-VLT002548 | C2010/10095 | 2010-09-02 | Saltholmen | 6399000 | 1263000 | M | Juvenile | 128,0 | 1 | 3 | Emaciation       | Emaciation       | Mild encephalitis; moderate lungworm infection; mild focal gastric ulceration in forestomach                                                                                                                               |
| 10-VLT002549 | C2010/10097 | 2010-10-19 | Ringhals   | 6353100 | 1277142 | F | Juvenile | 118,0 | 3 | 1 | Undetermined     | Undetermined     |                                                                                                                                                                                                                            |
| 12-VLT000150 | C2012/00005 | 2010-11-16 | Ringhals   | 6354142 | 1277286 | M | Calf     | 96,5  | 4 | 1 | Trauma           | Blunt trauma     |                                                                                                                                                                                                                            |
| 12-VLT000151 | C2012/00007 | 2011-04-16 | Höganäs    | 6238000 | 1297000 | M | Adult    | 150,0 | 3 | 3 | Probable bycatch | Probable bycatch |                                                                                                                                                                                                                            |
| 12-VLT000152 | C2012/00009 | 2011-05-31 | Gottskär   | 6370000 | 1271000 | M | Adult    | 154,5 | 3 | 1 | Probable bycatch | Probable bycatch | Mild granulomatous pneumonia                                                                                                                                                                                               |

|              |             |            |            |         |         |   |          |       |   |   |                     |                                                                                 |                                                                                                                                                                                                                       |
|--------------|-------------|------------|------------|---------|---------|---|----------|-------|---|---|---------------------|---------------------------------------------------------------------------------|-----------------------------------------------------------------------------------------------------------------------------------------------------------------------------------------------------------------------|
|              |             |            |            |         |         |   |          |       |   |   |                     |                                                                                 | associated with moderate lungworm infection; moderate gastric ulceration associated with moderate Anisakis parasitism; mild steatitis; adrenal cyst; mild to moderate biliary and pancreatic duct trematode infection |
| 12-VLT000153 | C2012/00006 | 2011-04-16 | Höganäs    | 6238000 | 1297000 | F | Adult    | 145,0 | 2 | 1 | Probable bycatch    | Probable bycatch                                                                | Mild to moderate granulomatous pneumonia associated with moderate to severe lungworm infection                                                                                                                        |
| 12-VLT000154 | C2012/00008 | 2011-08-15 | Vändelsö   | 6359000 | 1278000 | M | Calf     | 103,0 | 2 | 1 | Infectious disease  | Bacterial pericarditis and myocarditis ( <i>Staphylococcus aureus</i> ), sepsis | Mild to moderate lungworm infection                                                                                                                                                                                   |
| 12-VLT000155 | C2012/00004 | 2011-08-17 | Trelleborg | 6137000 | 1345000 | F | Adult    | 169,0 | 1 | 4 | Emaciation          | Emaciation                                                                      |                                                                                                                                                                                                                       |
| 12-VLT000156 | C2012/00001 | 2011-05-27 | Falsterbo  | 6144000 | 1311000 | F | Juvenile | 127,5 | 3 | 3 | Unsuitable material | Unsuitable material; heavily decomposed and scavenged                           |                                                                                                                                                                                                                       |

|              |             |            |                     |         |         |   |         |       |   |   |                     |                                          |                                                                                                                                                                                                                        |
|--------------|-------------|------------|---------------------|---------|---------|---|---------|-------|---|---|---------------------|------------------------------------------|------------------------------------------------------------------------------------------------------------------------------------------------------------------------------------------------------------------------|
| 12-VLT000157 | C2012/00003 | 2011-09-05 | Barsebäck kommun    | 6186000 | 1320000 | M | Adult   | 155,0 | 2 | 3 | Unsuitable material | Unsuitable material; severely decomposed |                                                                                                                                                                                                                        |
| 12-VLT000158 | C2012/00002 | 2011-12-07 | Bunkeflo strand     | 6162000 | 1317000 | M | Adult   | 136,0 | 3 | 2 | Probable bycatch    | Probable bycatch                         |                                                                                                                                                                                                                        |
| 12-VLT002016 | C2012/01697 | 2012-xx-xx | Råå strand          | 6212033 | 1308423 | F | Calf    | 105,5 | 3 | 1 | Probable bycatch    | Probable bycatch                         | Granulomatous splenitis and lymphadenitis                                                                                                                                                                              |
| 12-VLT002017 | C2012/01696 | 2012-03-22 | Höganäs             | 6232411 | 1298055 | M | Calf    | 118,0 | 4 | 1 | Bycatch             | Bycatch                                  |                                                                                                                                                                                                                        |
| 12-VLT002018 | C2012/01698 | 2012-07-25 | Alnarp              | 6212033 | 1308423 | M | Neonate | 85,0  | 1 | 3 | Emaciation          | Emaciation                               | Blunt trauma                                                                                                                                                                                                           |
| 12-VLT002019 | C2012/01695 | 2012-xx-xx | Skälderviken        | 6242520 | 1315912 | M | Adult   | 143,5 | 2 | 3 | Undetermined        | Undetermined                             | Moderate granulomatous pneumonia associated with moderate lungworm infection; poor condition; mild to moderate biliary and pancreatic duct trematode infection; mild to moderate nematode infection in tympanic cavity |
| 13-VLT003451 | C2013/07074 | 2013-04-12 | Helsingborg         | 6222000 | 1305000 | M | Calf    | 118,0 | 3 | 2 | Bycatch             | Bycatch                                  |                                                                                                                                                                                                                        |
| 13-VLT003452 | C2013/07070 | 2012-08-20 | Göteborg, Torslanda | 6401090 | 1259700 | M | Calf    | 97,5  | 1 | 1 | Emaciation          | Emaciation                               |                                                                                                                                                                                                                        |
| 13-VLT003453 | C2013/07072 | 2013-10-06 | Lappesand           | 6403589 | 1252063 | M | Calf    | .     | 3 | 3 | Undetermined        | Undetermined                             |                                                                                                                                                                                                                        |
| 13-VLT003455 | C2013/07069 | 2012-11-18 | Halmstad            | 6283000 | 1320000 | F | Calf    | 109,0 | 1 | 3 | Infectious disease  | Parasitic pneumonia                      | Emaciation; vagoliths (struvite)                                                                                                                                                                                       |

|              |             |            |                |         |         |   |          |       |   |   |                        |                                      |                                                                                                                                   |
|--------------|-------------|------------|----------------|---------|---------|---|----------|-------|---|---|------------------------|--------------------------------------|-----------------------------------------------------------------------------------------------------------------------------------|
| 13-VLT003456 | C2013/07067 | 2012-04-01 | Mölle          | 6253000 | 1297000 | F | Juvenile | 121,0 | 3 | 2 | Bycatch                | Bycatch                              |                                                                                                                                   |
| 13-VLT003457 | C2013/07075 | 2012-03-30 | Ängelholm      | 6239000 | 1317000 | F | Calf     | 101,5 | 3 | 3 | Bycatch                | Bycatch                              |                                                                                                                                   |
| 13-VLT003458 | C2013/07068 | 2012-04-06 | Rågelund       | 6361800 | 1281200 | F | Juvenile | 127,0 | 3 | 2 | Bycatch                | Bycatch                              |                                                                                                                                   |
| 13-VLT003459 | C2013/07073 | 2013-09-04 | Helsingborg    | 6207003 | 1309744 | F | Neonate  | 84,0  | 1 | 2 | Emaciation             | Emaciation                           | Healed rib fractures                                                                                                              |
| 15-VLT001999 | C2015/05286 | 2015-02-23 | Myggstadsviken | 6424192 | 1256195 | F | Adult    | 162,5 | 2 | 1 | Non-infectious disease | Ulcerative esophagitis and gastritis | Vagoliths, moderate biliary trematode infestation with chronic locally extensive cholangitis; mild to moderate lungworm infection |
| 15-VLT002000 | C2014/09319 | 2014-08-23 | Getterön       | 6338384 | 1281819 | F | Adult    | 155,0 | 3 | 3 | Undetermined           | Undetermined                         | Mild to moderate lungworm infection, mild biliary trematode infection with mild associated cholangitis                            |
| 15-VLT002001 | C2015/05285 | 2015-01-13 | Lysekil        | 6470583 | 1243426 | M | Adult    | 142,0 | 3 | 1 | Bycatch                | Bycatch                              | Adrenal adenoma; moderate biliary trematode infestation with associated cholangitis                                               |

|              |             |            |             |         |         |   |          |       |   |   |                     |                                                  |                                                                                                                           |
|--------------|-------------|------------|-------------|---------|---------|---|----------|-------|---|---|---------------------|--------------------------------------------------|---------------------------------------------------------------------------------------------------------------------------|
| 15-VLT002002 | C2015/05643 | 2015-08-03 | Trelleborg  | 6142600 | 1332600 | F | Neonate  | 89,5  | 3 | 3 | Unsuitable material | Unsuitable material                              |                                                                                                                           |
| 15-VLT002003 | C2015/05288 | 2015-04-28 | Tollenäs    | 6443138 | 1264534 | M | Calf     | 113,0 | 1 | 1 | Emaciation          | Emaciation                                       | Esophageal ulceration                                                                                                     |
| 15-VLT002004 | C2015/05287 | 2015-04-18 | Askön       | 6392523 | 1267350 | F | Juvenile | 132,0 | 3 | 3 | Unsuitable material | Unsuitable material                              | Mild to moderate lungworm infection; mild Anisakis infection in forestomach with associated ulcer                         |
| 15-VLT002044 | C2015/05597 | 2015-09-29 | Skanörhamn  | 6147020 | 1311680 | F | Calf     | 109,0 | 2 | 3 | Unsuitable material | Unsuitable material                              | Poor nutritional condition                                                                                                |
| 15-VLT002045 | C2015/05598 | 2015-09-17 | Möllöviken  | 6147960 | 1319780 | M | Calf     | 98,0  | 3 | 4 | Unsuitable material | Unsuitable material                              |                                                                                                                           |
| 16-VLT001260 | A2016/05539 | 2016-07-26 | Laholm      | 6272842 | 1324285 | F | Adult    | 165,0 | 1 | 2 | Infectious disease  | Parasitic pneumonia with intrabronchial thrombus | Gastric ulcer with severe Anisakis infestation; emaciation; dermatitis                                                    |
| 16-VLT001589 | A2016/05526 | 2016-09-06 | Helsingborg | 6164028 | 1288957 | M | Juvenile | 124,0 | 3 | 3 | Undetermined        | Undetermined                                     |                                                                                                                           |
| 16-VLT001590 | A2016/05522 | 2016-02-01 | Pinnevik    | 6457585 | 1232271 | M | Calf     | 117,0 | 2 | 2 | Infectious disease  | Parasitic pneumonia                              | Poor nutritional condition                                                                                                |
| 16-VLT001592 | A2016/05524 | 2016-07-16 | Munkevik    | 6464000 | 1242000 | M | Adult    | 143,0 | 3 | 2 | Probable bycatch    | Probable bycatch                                 | Granulomatous orchitis ( <i>Brucella sp.</i> ); moderate biliary trematode infection with moderate associated cholangitis |

|              |             |            |                     |         |         |   |          |       |   |   |                     |                                                                                            |                                                                                               |
|--------------|-------------|------------|---------------------|---------|---------|---|----------|-------|---|---|---------------------|--------------------------------------------------------------------------------------------|-----------------------------------------------------------------------------------------------|
| 16-VLT001594 | A2016/05527 | 2015-12-11 | kämpersvik          | 6483299 | 1229242 | M | Juvenile | 119,5 | 3 | 1 | Trauma              | Traumatic peritonitis                                                                      |                                                                                               |
| 16-VLT001595 | A2016/05521 | 2016-03-17 | Smögen              | 6463824 | 1225788 | F | Calf     | 103,5 | 3 | 2 | Probable bycatch    | Probable bycatch                                                                           |                                                                                               |
| 16-VLT001596 | A2016/05523 | 2016-07-14 | Onsala              | 6352555 | 1244550 | M | Neonate  | 80,0  | 1 | 4 | Unsuitable material | Unsuitable; severely decomposed                                                            |                                                                                               |
| 16-VLT001622 | A2016/05528 | 2016-xx-xx | Bropelarna till Kph | 6163400 | 1316200 | F | Calf     | 114,0 | 4 | 1 | Unsuitable material | Unsuitable; scavenged and internal organs missing                                          |                                                                                               |
| 16-VLT002068 | A2016/05637 | 2016-10-27 | Helsingborg         | 6218828 | 1305391 | M | Adult    | 141,5 | 3 | 1 | Infectious disease  | Parasitic biliary obstruction (cholestasis) leading to severe hepatic necrosis and icterus | Moderate to severe gastric ulceration (pylorus); moderate Anisakis infection; chronic colitis |
| 17-VLT001479 | A2017/05218 | 2017-04-04 | Höganäs             | 6234900 | 1297800 | U | Juvenile | 123,0 | 3 | 3 | Unsuitable material | Unsuitable material; severely decomposed and scavenged                                     |                                                                                               |
| 17-VLT001480 | A2017/05219 | 2017-04-09 | Mölle hamn          | 6244300 | 1294800 | M | Calf     | 118,0 | 3 | 2 | Undetermined        | Undetermined                                                                               | Focal chronic cholangitis (likely parasite-related)                                           |
| 17-VLT001481 | A2017/05216 | 2017-03-16 | Skrea strand        | 6311200 | 1298600 | M | Calf     | 112,0 | 4 | 1 | Bycatch             | Bycatch                                                                                    |                                                                                               |
| 17-VLT001482 | A2017/05215 | 2017-01-11 | Halmstad            | 6282813 | 1308449 | F | Juvenile | 128,0 | 3 | 1 | Probable bycatch    | Probable bycatch                                                                           | Severe lungworm infection with associated pneumonia                                           |
| 17-VLT001483 | A2017/05217 | 2017-03-22 | Höganäs             | 6234795 | 1301777 | F | Juvenile | 129,5 | 2 | 2 | Infectious disease  | Parasitic pneumonia                                                                        | Mild to moderate biliary trematode infection with associated                                  |



|                  |             |                |              |         |         |   |          |       |   |   |                       |                                                                                         |                                                                                                                                                                                                       |
|------------------|-------------|----------------|--------------|---------|---------|---|----------|-------|---|---|-----------------------|-----------------------------------------------------------------------------------------|-------------------------------------------------------------------------------------------------------------------------------------------------------------------------------------------------------|
|                  |             |                |              |         |         |   |          |       |   |   |                       |                                                                                         | cholangitis;<br>moderate<br>Anisakis<br>infection with<br>associated<br>ulceration in<br>forestomach;<br>poor<br>nutritional<br>condition                                                             |
| 17-<br>VLT001484 | A2017/05214 | 2016-<br>11-30 | Helsingborg  | 6237728 | 1305364 | F | Juvenile | 133,0 | 3 | 1 | Probable<br>bycatch   | Probable bycatch                                                                        | Mild to<br>moderate<br>Anisakis<br>infection of<br>forestomach<br>with associated<br>ulceration;<br>mild to<br>moderate<br>lungworm<br>infection                                                      |
| 17-<br>VLT001485 | A2017/05220 | 2017-<br>04-22 | Skälderviken | 6253937 | 1317018 | M | Calf     | 116,5 | 4 | 1 | Probable<br>bycatch   | Probable bycatch                                                                        |                                                                                                                                                                                                       |
| 17-<br>VLT002644 | A2017/05594 | 2017-<br>06-26 | Helsingborg  | 6217300 | 1305700 | F | Adult    | 162,0 | 2 | 1 | Probable<br>bycatch   | Probable bycatch                                                                        | Pox-like<br>dermatitis                                                                                                                                                                                |
| 17-<br>VLT002645 | A2017/05600 | 2017-<br>08-13 | Kungsbacka   | 6369737 | 1280315 | F | Adult    | 161,5 | 2 | 2 | Infectious<br>disease | Pulmonary<br>thrombus and<br>bacterial<br>endocarditis<br>( <i>Edwardsiella tarda</i> ) | Bacterial and<br>parasitic<br>pneumonia<br>associated with<br>moderate<br>lungworm<br>infection;<br>moderate to<br>severe gastric<br>ulceration<br>(forestomach);<br>moderate<br>biliary<br>trematode |

|              |             |            |                |         |         |   |       |       |   |   |                    |                                                                         |                                                                                                                                                                                                                                                     |
|--------------|-------------|------------|----------------|---------|---------|---|-------|-------|---|---|--------------------|-------------------------------------------------------------------------|-----------------------------------------------------------------------------------------------------------------------------------------------------------------------------------------------------------------------------------------------------|
|              |             |            |                |         |         |   |       |       |   |   |                    |                                                                         | infection with moderate cholangitis                                                                                                                                                                                                                 |
| 17-VLT002646 | A2017/05598 | 2017-08-04 | Särdal         | 6294500 | 1306000 | F | Adult | 162,0 | 2 | 1 | Infectious disease | Bacterial sepsis and meningoencephalitis ( <i>Streptococcus canis</i> ) | Moderate lungworm infection associated with mild to moderate pneumonia, adrenal adenoma; moderate to severe esophageal and forestomach ulceration; moderate biliary and pancreatic duct trematodes with associated ductal fibrosis and inflammation |
| 17-VLT002647 | A2017/05602 | 2017-09-17 | Hälsö          | 6374780 | 1250849 | M | Adult | 139,5 | 1 | 1 | Emaciation         | Emaciation                                                              |                                                                                                                                                                                                                                                     |
| 17-VLT002648 | A2017/05601 | 2017-08-24 | Mölle, Höganäs | 6246611 | 1292457 | M | Adult | 142,0 | 2 | 3 | Undetermined       | Undetermined                                                            | Mild to moderate cholangitis associated with moderate biliary trematode infection; mild mononuclear radiculitis; mild to moderate lungworm                                                                                                          |

|              |             |            |                 |         |         |   |          |       |   |   |                    |                                                                      |                                                                                                                                             |
|--------------|-------------|------------|-----------------|---------|---------|---|----------|-------|---|---|--------------------|----------------------------------------------------------------------|---------------------------------------------------------------------------------------------------------------------------------------------|
|              |             |            |                 |         |         |   |          |       |   |   |                    |                                                                      | infection; mild ulceration in forestomach                                                                                                   |
| 17-VLT002649 | A2017/05593 | 2017-06-19 | Hällevik, Orust | 6453520 | 1241855 | M | Adult    | 144,0 | 3 | 1 | Infectious disease | Encephalitis                                                         | Mild to moderate granulomatous pneumonia associated with mild to moderate lungworm infection; mild to moderate parasite-induced cholangitis |
| 17-VLT002650 | A2017/05597 | 2017-07-19 | Sunnäsfjorden   | 6488007 | 1227584 | M | Calf     | 109,5 | 2 | 1 | Emaciation         | Emaciation                                                           |                                                                                                                                             |
| 17-VLT002651 | A2017/05599 | 2017-08-13 | Särdal          | 6294000 | 1306000 | M | Juvenile | 122,5 | 2 | 2 | Undetermined       | Undetermined                                                         | Mild to moderate lungworm infection associated with mild pneumonia; mild esophageal ulceration                                              |
| 17-VLT002652 | A2017/05596 | 2017-07-11 | Getterön        | 6337258 | 1282549 | M | Adult    | 139,5 | 1 | 1 | Infectious disease | Bacterial pneumonia (group B <i>Salmonella enterica</i> ST416/ST417) | Moderate to severe lungworm infection; mild to moderate biliary trematode infection with associated cholangitis                             |

|              |             |            |               |         |         |   |          |       |   |   |                        |                                                         |                                                                                                                                                                      |
|--------------|-------------|------------|---------------|---------|---------|---|----------|-------|---|---|------------------------|---------------------------------------------------------|----------------------------------------------------------------------------------------------------------------------------------------------------------------------|
| 17-VLT002678 | A2017/05595 | 2017-07-03 | Skanör        | 6147000 | 1312000 | F | Adult    | 147,0 | 2 | 1 | Trauma                 | Acute blunt trauma                                      |                                                                                                                                                                      |
| 18-VLT001111 | A2018/05286 | 2018-04-08 | Höganäs       | 6234283 | 1297751 | M | Juvenile | 122,0 | 3 | 1 | Probable bycatch       | Probable bycatch                                        |                                                                                                                                                                      |
| 18-VLT001112 | A2018/05287 | 2018-04-14 | Orust         | 6461101 | 1266616 | F | Calf     | 105,5 | 3 | 3 | Unsuitable material    | Unsuitable material; severe decomposition               |                                                                                                                                                                      |
| 18-VLT001113 | A2018/05283 | 2017-11-20 | Lomma         | 6164336 | 1316931 | M | Adult    | 159,5 | 3 | 2 | Infectious disease     | Bacterial pneumonia ( <i>Schwanella putrefasciens</i> ) | Moderate lungworm infection with associated pneumonia; mild to moderate biliary trematode infection with associated cholangitis; pox-like dermatitis; mild steatitis |
| 18-VLT001114 | A2018/05284 | 2017-12-18 | Mellby strand | 6266129 | 1323113 | M | Adult    | 150,0 | 2 | 2 | Undetermined           | Undetermined                                            | Mild to moderate lungworm infection                                                                                                                                  |
| 18-VLT002397 | A2018/05707 | 2018-06-28 | Helsingborg   | 6219068 | 1305362 | F | Neonate  | 78,0  | 2 | 3 | Non-infectious disease | Stillborn                                               |                                                                                                                                                                      |
| 18-VLT002398 | A2018/05713 | 2018-10-13 | Oskarström    | 6300910 | 1327089 | M | Calf     | 109,0 | 4 | 1 | Bycatch                | Bycatch                                                 |                                                                                                                                                                      |
| 18-VLT002399 | A2018/05712 | 2018-09-05 | Trelleborg    | 6138695 | 1333695 | M | Adult    | 132,5 | 3 | 3 | Trauma                 | Trauma                                                  |                                                                                                                                                                      |
| 18-VLT002400 | A2018/05708 | 2018-07-09 | Sydskoster    | 6538131 | 1225841 | F | Neonate  | 82,0  | 3 | 2 | Abandoned              | Abandoned                                               | Gastric hemorrhage                                                                                                                                                   |
| 19-VLT000831 | A2019/05291 | 2019-01-07 | Ringhals      | 6354100 | 1277300 | M | Calf     | 111,5 | 3 | 1 | Trauma                 | Trauma                                                  | Mild to moderate lung edema; mild to moderate                                                                                                                        |

|              |             |            |             |         |         |   |          |       |   |   |                    |                                                               |                                                                                                                       |
|--------------|-------------|------------|-------------|---------|---------|---|----------|-------|---|---|--------------------|---------------------------------------------------------------|-----------------------------------------------------------------------------------------------------------------------|
|              |             |            |             |         |         |   |          |       |   |   |                    |                                                               | lungworm infection with focal, mild associated pneumonia; mild biliary fluke infestation with mild, focal cholangitis |
| 19-VLT000832 | A2019/05293 | 2019-02-14 | Domsten     | 6225000 | 1301000 | M | Calf     | 115,0 | 4 | 3 | Undetermined       | Undetermined; predation or post-mortem scavenging of head     |                                                                                                                       |
| 19-VLT000833 | A2019/05294 | 2019-02-26 | Varberg     | 6336500 | 1283900 | F | Calf     | 104,0 | 4 | 3 | Undetermined       | Undetermined, wounds suggestive of predation                  |                                                                                                                       |
| 19-VLT000834 | A2019/05292 | 2019-01-30 | Rydebäck    | 6208000 | 1309000 | M | Calf     | 110,0 | 4 | 1 | Trauma             | Trauma, corkscrew lesions                                     | Mild lungworm infection with mild to moderate associated pneumonia                                                    |
| 19-VLT000835 | A2019/05295 | 2019-03-11 | Vejbystrand | 6246000 | 1311000 | M | Juvenile | 121,0 | 4 | 1 | Trauma             | Trauma, anthropogenic or predation                            |                                                                                                                       |
| 19-VLT002835 | A2019/05578 | 2019-08-16 | Helsingborg | 6209069 | 1309680 | F | Juvenile | 132,5 | 3 | 1 | Infectious disease | Parasitic and bacterial pneumonia ( <i>Streptococcus</i> sp.) | Mild, focal biliary fluke infestation with mild, focal cholangitis                                                    |
| 19-VLT002836 | A2019/05585 | 2019-09-29 | Lomma       | 6175464 | 1327253 | M | Adult    | 144,5 | 2 | 2 | Undetermined       | Undetermined                                                  | Chronic stomach ulceration associated with severe Anisakis infection; moderate biliary                                |

|              |             |            |                  |         |         |   |         |       |   |   |                     |                                                               |                                                                                                                                                                          |
|--------------|-------------|------------|------------------|---------|---------|---|---------|-------|---|---|---------------------|---------------------------------------------------------------|--------------------------------------------------------------------------------------------------------------------------------------------------------------------------|
|              |             |            |                  |         |         |   |         |       |   |   |                     |                                                               | trematode infection with associated cholangitis; mild to moderate lungworm infection                                                                                     |
| 19-VLT002839 | A2019/05576 | 2019-07-14 | Rossö, Buhuslän  | 6534072 | 1232107 | F | Adult   | 155,0 | 2 | 3 | Infectious disease  | Parasitic and bacterial pneumonia ( <i>Streptococcus</i> sp.) | Subacute peritonitis; ulcerative gastritis associated with moderate Anisakis infection; poor condition; adrenocortical hyperplasia; moderate biliary trematode infection |
| 19-VLT002840 | A2019/05582 | 2019-08-26 | Norra Björkö     | 6408317 | 1254287 | M | Adult   | 138,0 | 2 | 3 | Unsuitable material | Unsuitable; severely decomposed                               | Moderate lungworm and biliary trematode infection                                                                                                                        |
| 19-VLT002843 | A2019/05574 | 2019-06-10 | Särö, Stallviken | 6381069 | 1268407 | F | Neonate | 80,0  | 3 | 2 | Abandoned           | Abandoned                                                     | Poor nutritional condition                                                                                                                                               |
| 19-VLT002844 | A2019/05584 | 2019-09-13 | Trelleborg       | 6140785 | 1332451 | M | Adult   | 144,0 | 3 | 3 | Unsuitable material | Unsuitable; severely decomposed                               | Severe lungworm infection in airways and vessels; mild to moderate biliary                                                                                               |

|              |             |            |                 |         |         |   |          |       |   |   |                     |                                                             |                                                                                                                             |
|--------------|-------------|------------|-----------------|---------|---------|---|----------|-------|---|---|---------------------|-------------------------------------------------------------|-----------------------------------------------------------------------------------------------------------------------------|
|              |             |            |                 |         |         |   |          |       |   |   |                     |                                                             | trematode infection                                                                                                         |
| 19-VLT002848 | A2019/05580 | 2019-08-21 | Ålabodarna      | 6206395 | 1310487 | F | Neonate  | 86,0  | 3 | 1 | Undetermined        | Undetermined (probable drowning-bycatch or predation)       |                                                                                                                             |
| 19-VLT002851 | A2019/05581 | 2019-08-26 | Haverdalsstrand | 6292817 | 1307518 | M | Calf     | 114,5 | 2 | 3 | Infectious disease  | Bacterial pneumonia ( <i>Erysipelothrix rhusiopathiae</i> ) | Moderate lungworm infection of vessels and airways                                                                          |
| 19-VLT002854 | A2019/05577 | 2019-08-06 | Risteören       | 6147367 | 1402178 | M | Adult    | 140,0 | 2 | 3 | Infectious disease  | Parasitic pneumonia                                         | Poor body condition; mild to moderate biliary trematode infection                                                           |
| 19-VLT002855 | A2019/05579 | 2019-08-11 | Bingsmarken     | 6141743 | 1353541 | M | Neonate  | 83,5  | 3 | 4 | Unsuitable material | Unsuitable; severely decomposed                             |                                                                                                                             |
| 19-VLT002856 | A2019/05583 | 2019-09-01 | Sandbystrand    | 6144599 | 1400138 | F | Calf     | 105,0 | 3 | 4 | Trauma              | Trauma consistent with predation                            |                                                                                                                             |
| 19-VLT002857 | A2019/05586 | 2019-10-10 | Nidingen        | 6359754 | 1264727 | M | Calf     | 103,5 | 3 | 2 | Unsuitable material | Unsuitable material; severely decomposed and scavenged      |                                                                                                                             |
| 20-VLT001389 | A2020/05381 | 2020-02-08 | Helsingborg     | 6217280 | 1305760 | F | Juvenile | 121,5 | 4 | 1 | Bycatch             | Bycatch                                                     | Moderate nematode infection in lungs and tympanic cavity; group B <i>Salmonella enterica</i> ST416/ST417 cultured from lung |
| 20-VLT001390 | A2020/05378 | 2020-01-12 | Onsala          | 6349872 | 1276219 | F | Juvenile | 118,5 | 4 | 1 | Trauma              | Trauma consistent with predation                            |                                                                                                                             |

|              |             |            |             |         |         |   |          |                |   |   |                     |                                                                                      |                                                                                                              |
|--------------|-------------|------------|-------------|---------|---------|---|----------|----------------|---|---|---------------------|--------------------------------------------------------------------------------------|--------------------------------------------------------------------------------------------------------------|
| 20-VLT001391 | A2020/05374 | 2019-07-27 | Stenungsund | 6461081 | 1246391 | M | Neonate  | 85,0           | 3 | 3 | Abandoned           | Abandoned                                                                            |                                                                                                              |
| 20-VLT001392 | A2020/05377 | 2020-01-10 | Svanvik     | 6451244 | 1256708 | M | Calf     | 105,5<br>+/- 2 | 2 | 1 | Infectious disease  | Bacterial infection (sepsis, <i>Streptococcus phocae</i> ); old infected bite wounds |                                                                                                              |
| 20-VLT001393 | A2019/05575 | 2019-07-11 | Malmö       | 6167672 | 1321013 | F | Neonate  | 88,0           | 3 | 4 | Unsuitable material | Unsuitable material                                                                  |                                                                                                              |
| 20-VLT001394 | A2020/05375 | 2019-11-13 | Nidingen    | 6347402 | 1242143 | F | Calf     | 110,5          | 4 | 1 | Undetermined        | Undetermined                                                                         | Oral cavity infection                                                                                        |
| 20-VLT001395 | A2020/05385 | 2020-05-27 | Strömsund   | 6480161 | 1231702 | M | Neonate  | 81,0           | 3 | 1 | Abandoned           | Euthanised (abandoned)                                                               |                                                                                                              |
| 20-VLT001397 | A2020/05379 | 2020-01-31 | Helsingborg | 6207562 | 1309674 | F | Juvenile | 125,5          | 3 | 1 | Bycatch             | Bycatch                                                                              | Severe lung parasitism with associated granulomatous pneumonia; severe nematode infection in tympanic cavity |
| 20-VLT001398 | A2020/05382 | 2020-03-18 | Lerhamn     | 6241493 | 1296419 | F | Juvenile | 124,0          | 4 | 1 | Undetermined        | Undetermined                                                                         | Mild to moderate nematode infection of tympanic cavity                                                       |
| 20-VLT001399 | A2020/05380 | 2020-02-05 | Helsingborg | 6217167 | 1305208 | M | Calf     | 118,0          | 4 | 1 | Bycatch             | Bycatch                                                                              |                                                                                                              |
| 20-VLT001400 | A2020/05383 | 2020-04-08 | Strömstad   | 6540384 | 1229822 | F | Adult    | 148,0          | 3 | 1 | Probable bycatch    | Probable bycatch                                                                     | Severe lungworm infection with associated granulomatous pneumonia                                            |
| 20-VLT001401 | A2020/05376 | 2019-12-26 | Skanör      | 6141422 | 1310042 | M | Juvenile | 118,5          | 2 | 1 | Infectious disease  | Fungal infection (pneumonia, <i>Aspergillus</i> sp.);                                | Congenital heart defect; dermatitis;                                                                         |



|              |             |            |                 |         |         |   |          |       |   |   |                     |                                                                           |                                                                                                                  |
|--------------|-------------|------------|-----------------|---------|---------|---|----------|-------|---|---|---------------------|---------------------------------------------------------------------------|------------------------------------------------------------------------------------------------------------------|
|              |             |            |                 |         |         |   |          |       |   |   |                     |                                                                           | mild to moderate lungworm infection                                                                              |
| 20-VLT002012 | A2020/05728 | 2020-08-24 | Höganäs         | 6234950 | 1297830 | F | Adult    | 158,7 | 1 | 3 | Emaciation          | Emaciation                                                                |                                                                                                                  |
| 20-VLT002255 | A2020/05731 | 2020-08-29 | Kåseberga       | 6140875 | 1390047 | F | Calf     | 107,7 | 4 | 3 | Probable bycatch    | Probable bycatch                                                          |                                                                                                                  |
| 20-VLT002256 | A2020/05730 | 2020-08-25 | Trelleborg      | 6140757 | 1332198 | F | Adult    | 142,3 | 3 | 4 | Unsuitable material | Unsuitable material                                                       |                                                                                                                  |
| 20-VLT002365 | A2020/05732 | 2020-09-09 | Ystad           | 6123601 | 1392771 | F | Juvenile | 131,0 | 3 | 4 | Unsuitable material | Unsuitable material                                                       | Mild to moderate lungworm infection                                                                              |
| 20-VLT002366 | A2020/05735 | 2020-09-17 | Helsingborg     | 6218793 | 1305362 | F | Calf     | 111,0 | 4 | 3 | Bycatch             | Bycatch                                                                   |                                                                                                                  |
| 20-VLT002367 | A2020/05734 | 2020-09-16 | Naturum Öresund | 6140362 | 1294171 | M | Adult    | 132,0 | 3 | 3 | Infectious disease  | Bacterial ( <i>Erysipelothrix rhusiopathiae</i> ) and parasitic pneumonia | Gastric ulcers                                                                                                   |
| 20-VLT002369 | A2020/05733 | 2020-09-12 | Ystad           | 6147395 | 1384409 | M | Adult    | 145,0 | 3 | 4 | Unsuitable material | Unsuitable material                                                       | Mild to moderate lungworms, biliary trematodes and tympanic cavity nematode infection                            |
| 20-VLT002422 | A2020/05737 | 2020-09-21 | Skanör          | 6146822 | 1311672 | F | Adult    | 157,6 | 2 | 3 | Unsuitable material | Unsuitable material                                                       | Mild to moderate granulomatous pneumonia with moderate lung worms; mild to moderate nematodes in tympanic cavity |

|              |             |            |             |         |         |   |          |       |   |   |                  |                                                               |                                                                                                          |
|--------------|-------------|------------|-------------|---------|---------|---|----------|-------|---|---|------------------|---------------------------------------------------------------|----------------------------------------------------------------------------------------------------------|
| 20-VLT002959 | A2020/05736 | 2020-10-13 | Helsingborg | 6217189 | 1304741 | F | Calf     | 104,3 | 4 | 2 | Undetermined     | Undetermined                                                  |                                                                                                          |
| 20-VLT003002 | A2020/05745 | 2020-10-28 | Malmö       | 6141630 | 1295472 | F | Juvenile | 118,0 | 4 | 1 | Undetermined     | Undetermined, consistent with drowning but cause undetermined | Bacterial nephritis                                                                                      |
| 20-VLT003026 | A2020/05724 | 2020-07-19 | Ängelholm   | 6242364 | 1316033 | M | Neonate  | 85,5  | 3 | 1 | Abandoned        | Abandoned                                                     | Hepatic and renal lipidosis                                                                              |
| 20-VLT003027 | A2020/05721 | 2020-07-09 | Orust       | 6533065 | 1234877 | F | Adult    | 165,0 | 3 | 1 | Probable bycatch | Probable bycatch                                              | Severe biliary trematode infection                                                                       |
| 20-VLT003028 | A2020/05727 | 2020-08-09 | Kungsbacka  | 6360713 | 1243582 | M | Neonate  | 76,0  | 2 | 1 | Abandoned        | Abandoned                                                     | Esophageal ulcers; hepatic and renal lipidosis                                                           |
| 20-VLT003029 | A2020/05720 | 2020-06-08 | Örmestad    | 6463452 | 1238894 | F | Neonate  | 71,0  | 3 | 3 | Abandoned        | Abandoned                                                     |                                                                                                          |
| 20-VLT003030 | A2020/05729 | 2020-08-09 | Varberg     | 6363973 | 1280853 | M | Calf     | 95,0  | 3 | 3 | Probable bycatch | Probable bycatch                                              |                                                                                                          |
| 20-VLT003031 | A2020/05722 | 2020-07-16 | Halmstad    | 6283323 | 1314454 | M | Juvenile | 118,8 | 2 | 1 | Probable bycatch | Probable bycatch                                              | Mild to moderate liver fibrosis                                                                          |
| 20-VLT003032 | A2020/05726 | 2020-07-20 | Ängelholm   | 6238380 | 1314560 | F | Adult    | 154,0 | 3 | 3 | Trauma           | Trauma; uterine rupture                                       | Severe lung parasitism with mild granulomatous pneumonia; moderate to severe biliary trematode infection |
| 20-VLT003140 | A2020/05781 | 2020-07-15 | Falkenberg  | 6304398 | 1304448 | F | Neonate  | 80,5  | 2 | 1 | Abandoned        | Abandoned                                                     | Hepatic lipidosis                                                                                        |

<sup>a</sup> Nutritional status: 1=emaciated; 2=poor; 3=normal; 4=robust

<sup>b</sup> Decomposition score: 1= mild; 2=moderate; 3=severe; 4=disintegrating/mummified
